# Supplementary material for: ABCB1 Genetic Effects on Antidepressant Outcomes: A Report From the iSPOT-D Trial
Source: Atypon-hosted journal article supplement (doi:10.1176/appi.ajp.2015.14050680), 2015-03-29
Supplement: appi.ajp.2015.14050680.ds001.pdf [file appi.ajp.2015.14050680.ds001.pdf]

FIGURE S1. CONSORT Diagram

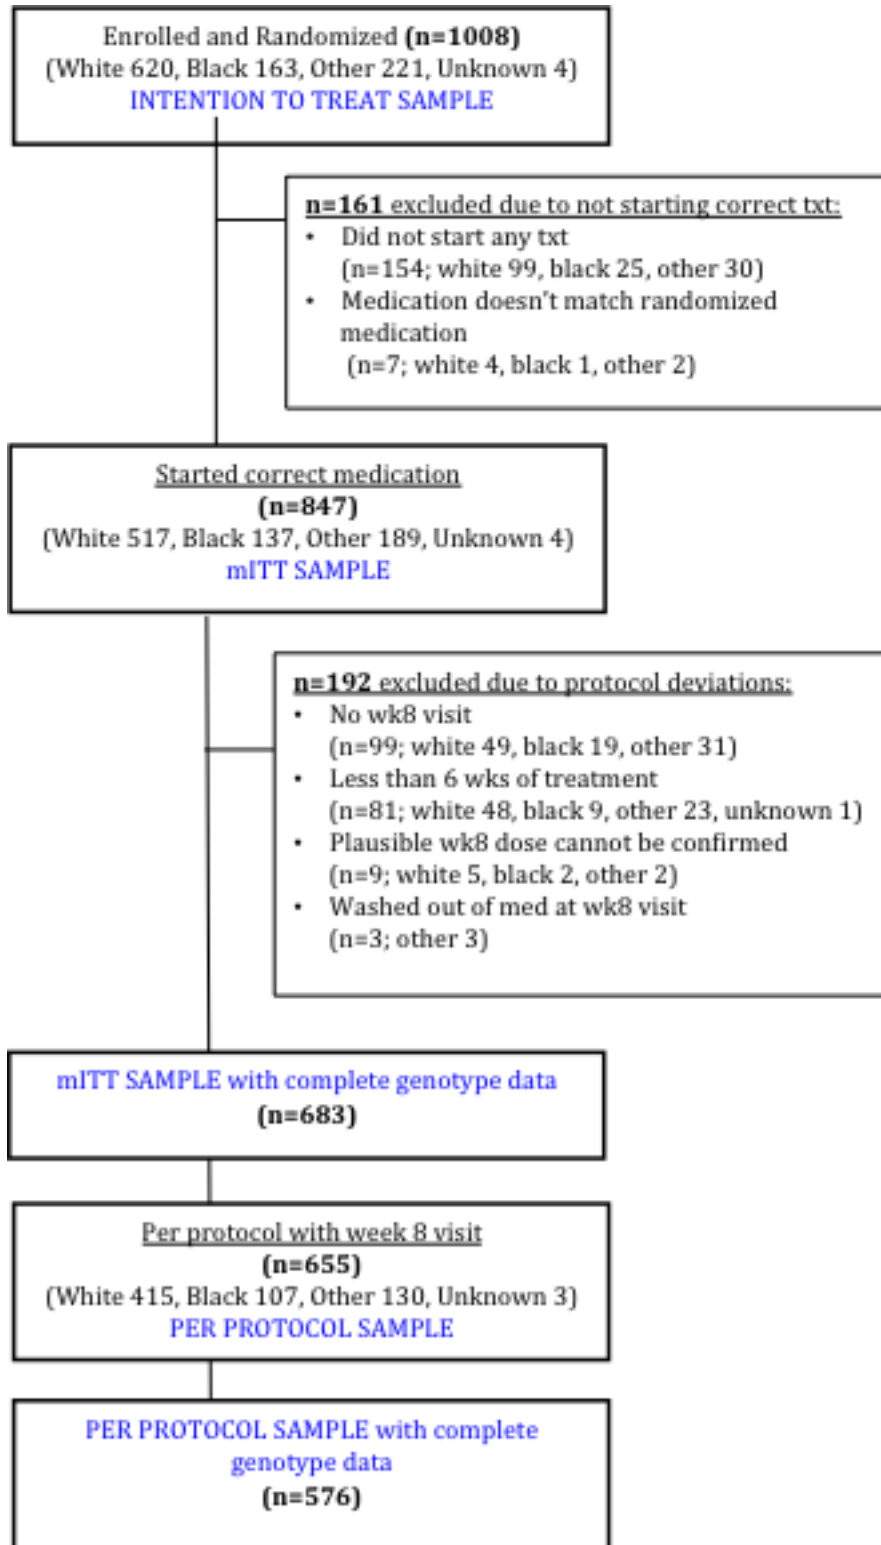

**FIGURE S2. Summary of Inclusion and Exclusion Criteria**

| <b>Inclusion Criteria</b>                                                                                                                                                                                                                                                                                                                                                                                                                                                                                                                                                                                                                                                                                                                                                                                                                                                                                                                                                                                                                                                                                                                                                                                                                                                                                                                                                                                                                                                                                                                                                                                                                                                                                                                                                                                                                                          |
|--------------------------------------------------------------------------------------------------------------------------------------------------------------------------------------------------------------------------------------------------------------------------------------------------------------------------------------------------------------------------------------------------------------------------------------------------------------------------------------------------------------------------------------------------------------------------------------------------------------------------------------------------------------------------------------------------------------------------------------------------------------------------------------------------------------------------------------------------------------------------------------------------------------------------------------------------------------------------------------------------------------------------------------------------------------------------------------------------------------------------------------------------------------------------------------------------------------------------------------------------------------------------------------------------------------------------------------------------------------------------------------------------------------------------------------------------------------------------------------------------------------------------------------------------------------------------------------------------------------------------------------------------------------------------------------------------------------------------------------------------------------------------------------------------------------------------------------------------------------------|
| <ul style="list-style-type: none"><li>• Age 18-65</li><li>• Fluent and literate in English or Dutch</li><li>• Provide written informed consent</li><li>• Total HRSD<sub>17</sub> ≥16</li><li>• Meets DSM-IV* criteria for single or recurrent nonpsychotic MDD established by MINI Plus</li></ul>                                                                                                                                                                                                                                                                                                                                                                                                                                                                                                                                                                                                                                                                                                                                                                                                                                                                                                                                                                                                                                                                                                                                                                                                                                                                                                                                                                                                                                                                                                                                                                  |
| <b>Exclusion Criteria</b>                                                                                                                                                                                                                                                                                                                                                                                                                                                                                                                                                                                                                                                                                                                                                                                                                                                                                                                                                                                                                                                                                                                                                                                                                                                                                                                                                                                                                                                                                                                                                                                                                                                                                                                                                                                                                                          |
| <ul style="list-style-type: none"><li>• Suicidal ideation and/or tendencies, defined by a score ≥8 on Section C of the MINI Plus</li><li>• History of bipolar disorder (I, II, not otherwise specified) (lifetime)</li><li>• History of schizophrenia, schizoaffective disorder, or psychosis not otherwise specified (lifetime)</li><li>• Current primary diagnosis of anorexia or bulimia, obsessive-compulsive disorder, or primary post-traumatic stress disorder</li><li>• Known contra-indication for escitalopram, sertraline and/or venlafaxine-XR, or previous treatment failure at the highest recommended dose</li><li>• Taking any medication that is contraindicated with escitalopram, sertraline, or venlafaxine-XR</li><li>• Taking escitalopram, sertraline, or venlafaxine-XR in the current episode of MDD</li><li>• Use of any non-protocol antidepressant drug or CNS drug (antipsychotic, anticonvulsant, anxiolytic, clonidine) that cannot be washed out prior to participation</li><li>• Has general medical condition that contraindicates protocol antidepressant treatments or interferes with protocol measurements (such as epileptic condition for EEG recording)</li><li>• Substance dependence (including alcohol intake equaling 29 standard alcoholic drinks per week for males; &gt;15 for females) in the past six months</li><li>• History of brain injury or blow to the head that resulted in loss of consciousness for greater than five minutes</li><li>• Severe impediment to vision, hearing and/or hand movement that is likely to interfere with completion of assessments, or with comprehension of instructions or study requirements</li><li>• Participation in an investigational study within four months prior to baseline that could affect symptoms of MDD</li><li>• Is pregnant or breast-feeding</li></ul> |

**TABLE S1. Comparison of Modified Intent-to-Treat (mITT) Sample and Excluded Patients**

| Measure                                      | Level    | mITT Sample   |         | Excluded Patients with Genotypes |         | t or $\chi^2$ | p     |
|----------------------------------------------|----------|---------------|---------|----------------------------------|---------|---------------|-------|
|                                              |          | Mean or Count | SD or % | Mean or Count                    | SD or % |               |       |
| Age                                          |          | 38.65         | 12.79   | 36.00                            | 12.27   | 2.688         | 0.008 |
| Gender (number of females)                   |          | 392           | 57.39%  | 111                              | 54.15%  | 0.551         | 0.458 |
| Ethnicity                                    |          |               |         |                                  |         | 3.760         | 0.584 |
|                                              | Black    | 106           | 15.52%  | 37                               | 18.05%  |               |       |
|                                              | Hispanic | 56            | 8.20%   | 19                               | 9.27%   |               |       |
|                                              | Mixed    | 26            | 3.81%   | 4                                | 1.95%   |               |       |
|                                              | Other    | 68            | 9.96%   | 23                               | 11.22%  |               |       |
|                                              | Unknown  | 3             | 0.44%   | 0                                | 0.00%   |               |       |
|                                              | White    | 424           | 62.08%  | 122                              | 59.51%  |               |       |
| Years of Education                           | -        | 14.54         | 2.88    | 14.43                            | 2.57    | 0.534         | 0.594 |
| Duration of MDD (Age - age of first episode) | -        | 14.81         | 12.57   | 13.22                            | 11.31   | 1.699         | 0.090 |
| Age of first episode                         | -        | 23.28         | 12.11   | 22.08                            | 11.95   | 1.244         | 0.214 |
| Weight (Kg)                                  | -        | 79.45         | 21.03   | 76.41                            | 22.79   | 1.680         | 0.094 |
| HDRS anxiety score                           | -        | 6.16          | 1.93    | 6.20                             | 1.96    | -0.281        | 0.779 |
| Baseline HAMD severity                       | -        | 21.70         | 4.06    | 22.34                            | 4.24    | -1.917        | 0.056 |
| Baseline QIDS severity                       | -        | 14.54         | 3.77    | 14.22                            | 3.88    | 1.029         | 0.304 |
